# Supplementary material for: An efficient reagent for covalent introduction of alkynes into proteins
Source: Royal Society of Chemistry journal article supplement (doi:10.1039/c4ob01873g), 2014-10-16
Supplement: c4ob01873g1.pdf [file c4ob01873g1.pdf]

# Supporting Information

## An efficient reagent for covalent introduction of alkyne into proteins

Jie Zhang,<sup>‡,a,d</sup> Dejun Ma,<sup>‡,b,c</sup> Dawei Du,<sup>a,d</sup> Zhen Xi<sup>\*,b,c</sup> and Long Yi<sup>\*,a,c,d</sup>

<sup>a</sup> State Key Laboratory of Organic-Inorganic Composites, Beijing University of Chemical Technology, 15 Beisanhuan East Road, Chaoyang District, Beijing 100029, China. E-mail: yilong@mail.buct.edu.cn.

<sup>b</sup> State Key Laboratory of Elemento-Organic Chemistry and Department of Chemical Biology, National Pesticide Engineering Research Center (Tianjin), Nankai University, Tianjin, 300071, China. Tel: 86 22 23504782; E-mail: zhenxi@nankai.edu.cn.

<sup>c</sup> Collaborative Innovation Center of Chemical Science and Engineering (Tianjin).

<sup>d</sup> Public Hatching Platform for Recruited Talents of Beijing University of Chemical Technology.

<sup>‡</sup> The authors pay equal contributions to this work.

|                           |          |
|---------------------------|----------|
| <b>Experimental part</b>  | <b>2</b> |
| <b>Supporting figures</b> | <b>7</b> |

## Experimental part

### 1. Synthesis of the diazonium reagent **2**

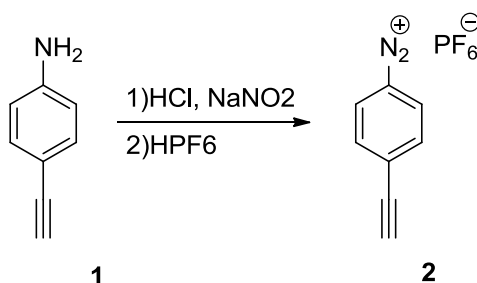

**4-Ethynyl Benzene Diazonium Hexafluorophosphate (2).** 4-Ethynylaniline (1.00 g, 8.5 mmol) was dissolved in 30 mL cold concentrated HCl. The water solution of NaNO<sub>2</sub> (1.77 g, 25.6 mmol) was slowly added to the mixture at -10 °C. After 1.5 h reaction, 60% HPF<sub>6</sub> in water (2.5 mL, 17.0 mmol) was added at -10 °C and stirred for 1 h. Then the mixture was stirred at room temperature for 30 min. The product were collected by filtration and washed with ice-cold water, yielding a light yellow solid of **2** (1.34 g, 57%). <sup>1</sup>H NMR (600 MHz, DMSO-*d*<sub>6</sub>), δ 8.70-8.65 (m, 2H), 8.01 (d, *J* = 8.4 Hz, 2H), 5.04 (s, 1H). <sup>13</sup>C NMR (151 MHz, DMSO-*d*<sub>6</sub>), δ 133.9, 133.8, 132.9, 115.3, 91.2, 81.1. <sup>31</sup>P NMR (243 MHz, DMSO-*d*<sub>6</sub>), δ -144.23 (h, *J*<sub>P-F</sub> = 711.2 Hz). <sup>19</sup>F NMR (376 MHz, DMSO-*d*<sub>6</sub>), δ -70.30 (d, *J*<sub>P-F</sub> = 711.2 Hz). HRMS (ESI): *m/z* [M]<sup>+</sup> calcd. for C<sub>6</sub>H<sub>5</sub>N<sub>2</sub>: 129.0447; found: 129.0447.

### 2. Synthesis of fluorescence probe (**6**).

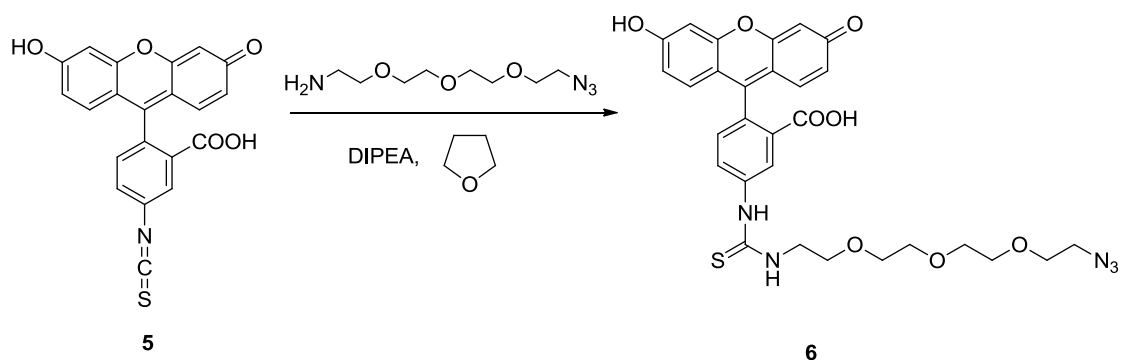

A mixture of fluorescein isothiocyanate isomer I **5** (77.9 mg, 0.2 mmol) and

11-azido-3,6,9-trioxaundecan-1-amine (40  $\mu\text{L}$ , 0.2 mmol) was dissolved in 9 mL dry tetrahydrofuran. DIPEA (38  $\mu\text{L}$ , 0.22 mmol) was added to the reaction mixture and stirred at room temperature for 2 h. The crude product was purified by silica gel column chromatography ( $\text{CH}_2\text{Cl}_2/\text{CH}_3\text{OH}$ ). TLC  $R_f = 0.74$  ( $\text{CH}_2\text{Cl}_2/\text{CH}_3\text{OH} = 9:1$ ).  $^1\text{H}$  NMR (400 MHz, MeOD),  $\delta$  8.17 (s, 1H), 7.73 (d,  $J = 7.7$  Hz, 1H), 7.10 (d,  $J = 8.1$  Hz, 1H), 6.64 (d,  $J = 7.3$  Hz, 4H), 6.50 (d,  $J = 8.5$  Hz, 2H), 3.70 (bs, 2H), 3.64-3.55 (m, 12H), 3.26 (s, 2H).  $^{13}\text{C}$  NMR (101 MHz, MeOD),  $\delta$  182.6, 171.2, 161.8, 154.3, 148.8, 142.3, 131.4, 130.8, 130.4, 129.2, 125.8, 119.8, 113.9, 111.6, 103.5, 71.5, 71.2, 70.9, 70.1, 51.6, 45.4.

### 3. Synthesis of azido-PEG2000 (**9a**) and azido-PEG6000 (**9b**).

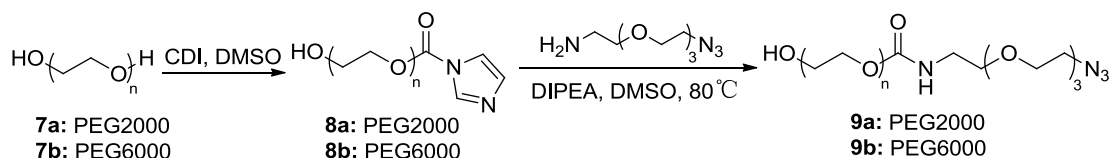

**PEG2000-N<sub>3</sub> (9a).** **7a** (4.0 g, 2.0 mmol) was heated at 80  $^\circ\text{C}$  under reduced pressure to remove trace water. The solid was dissolved by 40 mL DMSO after cooling down to room temperature. CDI (1.62 g, 10.0mmol) was added to the solution and stirred for 19 h. Then the solution was diluted with 500 mL EtOAc and put at -20  $^\circ\text{C}$  for 5 h. The resulting white precipitate was collected by filtration and washed by  $\text{Et}_2\text{O}$  to give **8a** (397 mg, 0.2 mmol), which was dissolved in 3 mL DMSO. 11-Azido-3,6,9-trioxaundecan-1-amine (60  $\mu\text{L}$ , 0.3 mmol) and DIPEA (103  $\mu\text{L}$ , 0.6 mmol) were added to the DMSO solution. After heated at 80  $^\circ\text{C}$  for 24 h, the mixture was washed by brine and extracted with  $\text{CH}_2\text{Cl}_2$  (3  $\times$  25 mL). The  $\text{CH}_2\text{Cl}_2$  solution was dried by  $\text{Na}_2\text{SO}_4$  and concentrated under reduced pressure. And the resulting oil-like mixture was diluted with 125 mL EtOAc and put at -20  $^\circ\text{C}$  overnight. After pouring the supernate and diluted with  $\text{Et}_2\text{O}$ , the white precipitate was collected by centrifugation (4000 rpm, 0  $^\circ\text{C}$ , 10 min). Then the solid was washed with  $\text{Et}_2\text{O}$  and was centrifuged again. The product **9a** was obtained by drying the solid under reduced pressure, yield 84.4 mg (18.8%).  $^1\text{H}$  NMR (400 MHz,  $\text{DMSO}-d_6$ )  $\delta$  7.18 (t,  $J = 5.4$

Hz, 1H), 4.04 (t,  $J = 9.2$  Hz, 2H), 3.73-3.33 (m,  $\approx 171$ H), 3.16-3.06 (m, 2H).  $^{13}\text{C}$  NMR (101 MHz,  $\text{DMSO-}d_6$ )  $\delta$  156.2, 72.3, 69.8, 69.7, 69.5, 69.3, 69.1, 68.8, 63.1, 60.2, 50.0.

**PEG6000-N<sub>3</sub> (9b).** PEG6000 **7b** (12.0 g, 2.0 mmol) was heated at 80 °C under reduced pressure to remove water. The solid was dissolved by 40 mL DMSO (with 5%  $\text{CH}_2\text{Cl}_2$  to facilitate the dissolution of PEG6000) after cooling down to room temperature. CDI (1.56 g, 9.6 mmol) was added to the solution and stirred for 2 days. After removing  $\text{CH}_2\text{Cl}_2$  under reduced pressure, the solution was diluted with 500 mL EtOAc and put at -20 °C overnight. The resulting white precipitate was collected by filtration and washed by  $\text{Et}_2\text{O}$  to give **8b** (5.86 g, 48%). **8b** (1.20 g, 0.2 mmol) was dissolved in 5 mL DMSO. 11-Azido-3,6,9-trioxaundecan-1-amine (60  $\mu\text{L}$ , 0.3 mmol) and DIPEA (103  $\mu\text{L}$ , 0.6 mmol) were added to the DMSO solution. After heated at 80 °C for 40 h, the mixture was washed by brine and extracted with  $\text{CH}_2\text{Cl}_2$  ( $3 \times 25$  mL). The  $\text{CH}_2\text{Cl}_2$  solution was dried by  $\text{Na}_2\text{SO}_4$  and concentrated under reduced pressure. And the resulting oil-like mixture was diluted with 150 mL EtOAc and put at -20 °C overnight. The resulted white precipitate was collected by centrifugation. The product **9b** was given by drying the solid under reduced pressure, yield 586.3 mg (47.1%).  $^1\text{H}$  NMR (400 MHz,  $\text{DMSO-}d_6$ )  $\delta$  7.18 (t,  $J = 5.5$  Hz, 1H), 4.04 (t,  $J = 9.2$  Hz, 2H), 3.80-3.35 (m,  $\approx 483$ H), 3.16-3.07 (m, 2H).  $^{13}\text{C}$  NMR (101 MHz,  $\text{DMSO-}d_6$ )  $\delta$  156.2, 72.3, 69.8, 69.7, 69.5, 69.3, 69.1, 68.8, 63.1, 60.2, 50.0.

#### 4. Reaction with Tyr-containing small molecule.

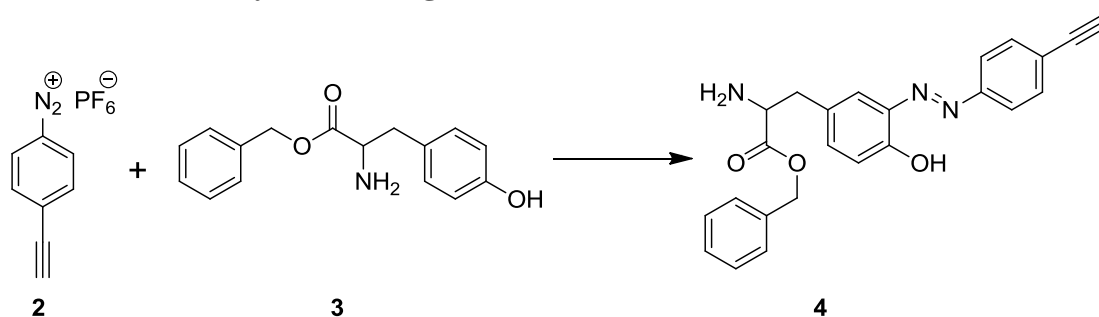

**Product 4 for HRMS.** 10  $\mu\text{L}$  100 mM **2** in  $\text{CH}_3\text{CN}$  and 10  $\mu\text{L}$  100 mM **3** in DMSO were co-incubated in 80  $\mu\text{L}$  50 mM PBS (pH 8.0, containing 30%  $\text{CH}_3\text{CN}$ ) for 1 h at

room temperature. Then the reaction mixture was submitted into ESI-MS without purification.

**UV-Vis analysis of the reaction.** To 2 mL PBS (50 mM, pH 7.0 or pH 8.0, containing 30% CH<sub>3</sub>CN ) was added 2  $\mu$ L **2** (100 mM) in CH<sub>3</sub>CN and 2  $\mu$ L **3** (100 mM) in DMSO. The progress of the reaction was monitored by UV-Vis spectrophotometry from 250 to 600 nm. In order to explore the kinetics of the reaction more accurately, the reaction progress was monitored by UV-Vis spectrophotometry at 400 nm. The reaction condition is 2  $\mu$ L **2** (100 mM) in CH<sub>3</sub>CN and 20  $\mu$ L **3** (100 mM) in DMSO was added to 1.98 mL PBS (50 mM, pH 7.0 or pH 8.0, containing 30% CH<sub>3</sub>CN).

### **5. Fluorescence labeling of BSA.**

500  $\mu$ L BSA (100  $\mu$ M) solution in 50 PBS (mM, pH 8.0) was added 1  $\mu$ L **2** (100 mM) in DMSO and the mixture was co-incubated for 2 h at room temperature. The fluorescence labelling was based on click reaction by copper catalyst. The **click catalyst** (10 mM) was prepared as a mixture of 50  $\mu$ L TBTA (20 mM), 30  $\mu$ L deionized water, 10  $\mu$ L Cu<sup>2+</sup> (100 mM) and 10  $\mu$ L ascorbic acid (vitamin C, 200 mM, fresh preparation). 1  $\mu$ L fluorescence probe **6** (100 mM in DMSO) and 25  $\mu$ L catalyst was added to 475  $\mu$ L alkyne-modified BSA or native BSA (negative control) for 2 h reaction at room temperature. The labeled BSA suspension was directly electrophored in 15% SDS-PAGE. The PAGE was firstly imaged under the UV light to detect whether the BSA was labelled. After the UV imaging, the PAGE was stained by Coomassie brilliant blue for 1 h and destained by the glacial acetic acid/alcohol/water mixture (1:1:8).

### **6. Fluorescence labeling of TMV particles.**

To label the TMV particles, 10 mg/mL TMV suspension (99  $\mu$ L) was incubated with 1  $\mu$ L **2** (100 mM) in PBS buffer (0.1 M, pH 7.0) for 2 h at room temperature. The reaction mixture was then transferred into a centrifugal filtration device (3 KDa, Millipore) and eluted by PBS. 80  $\mu$ L **2**-labelled TMV was incubated with 1  $\mu$ L fluorescence probe **6** (100 mM in DMSO) and 10  $\mu$ L **click catalyst** for 2 h at room

temperature. The same reaction except the native TMV suspension was set as the negative control. The labelled TMV suspension was denatured by base and then electrophored in 10% SDS-PAGE. The PAGE was firstly imaged under the UV light and then stained by Coomassie brilliant blue.

### **7. Protein PEGylation.**

To achieve the protein PEGylation, we selected a small protein lysozyme (14.4 KDa). A 10  $\mu$ L lysozyme (2 mM) solution was incubated with 1  $\mu$ L **2** (100 mM) in 89  $\mu$ L PBS buffer (50 mM, pH 8.0) for 2 h at room temperature. The reaction mixture was transferred into a centrifugal filtration device (10 KDa, Millipore) and eluted by PBS buffer (50 mM, pH 8.0). 85  $\mu$ L lysozyme elution was then incubated overnight with 5  $\mu$ L 20 mM PEG2000-N<sub>3</sub> (or PEG6000-N<sub>3</sub>) dissolved in DMSO and 10  $\mu$ L **click catalyst** at 4  $^{\circ}$ C. The bioconjugations were analyzed by 10% SDS-PAGE. The gel was stained by R250 (Coomassie brilliant blue) for 1 h and destained by the glacial acetic acid/alcohol/water mixture (1:1:8). The band shift was imaged by the Gel Doc XRi instrument (Bio-Rad) and processed with the Quantity One software.

## Supporting figures

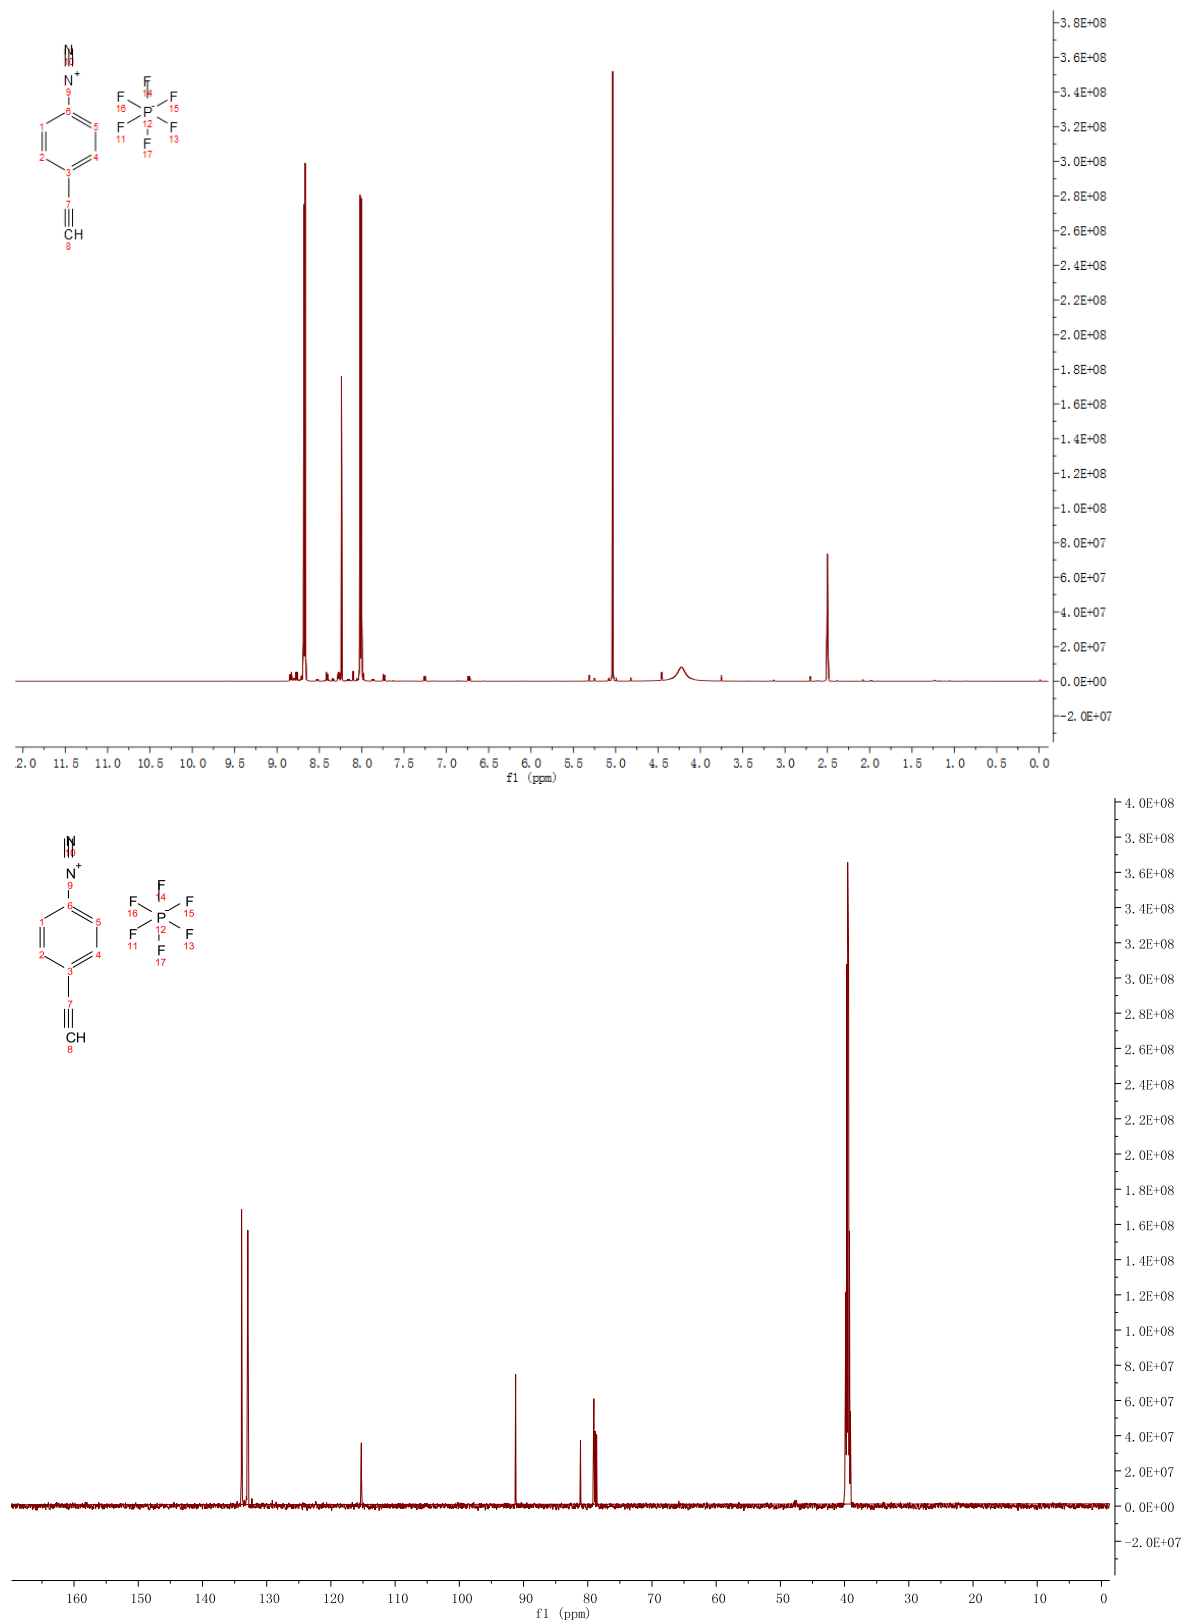

**Fig. S1.**  $^1\text{H-NMR}$  and  $^{13}\text{C-NMR}$  spectra of **2**.

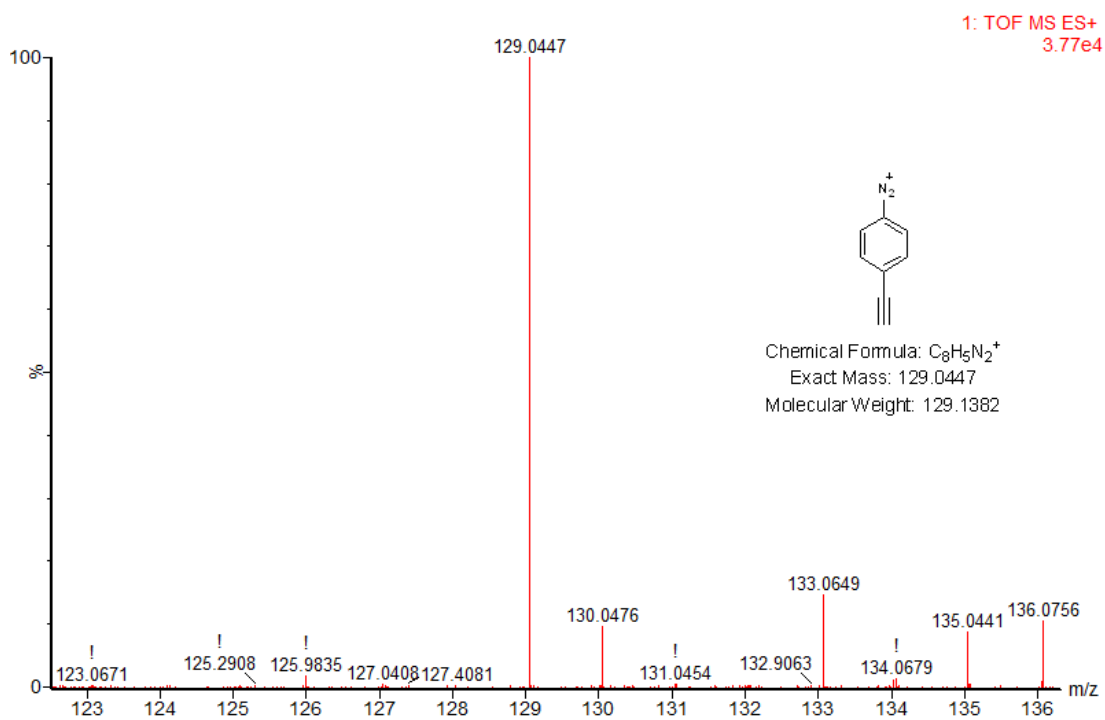

**Fig. S2.** HRMS spectrum of **2**.

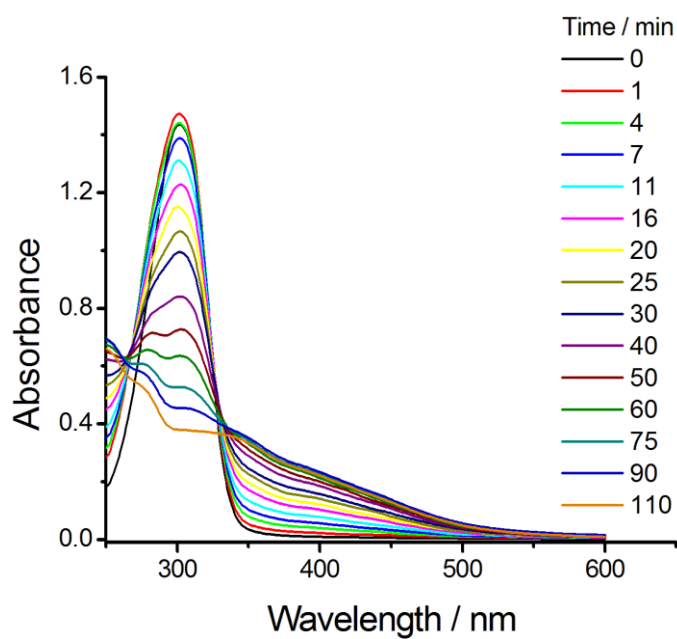

**Fig. S3** Time-dependent UV-Vis absorbance spectra of **2** (100  $\mu$ M) upon treatment with **3** (100  $\mu$ M) in 50 mM PBS (pH 7.0, containing 30%  $CH_3CN$ ) at room temperature. The different reaction time is indicated inset.



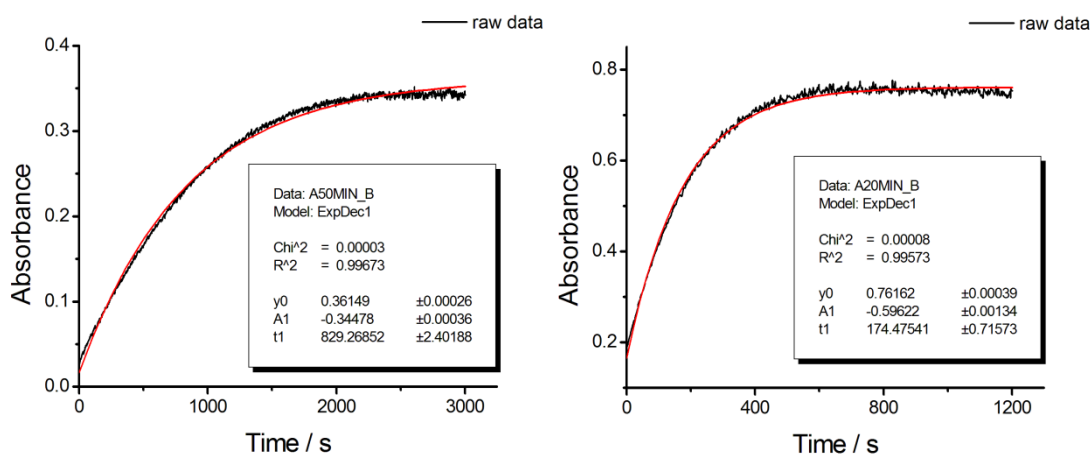

**Fig. S4** The absorbance at 400 nm versus reaction time of **2** (100  $\mu$ M) upon treatment with **3** (1 mM) in 50 mM PBS (pH 7.0 (left) or pH 8.0 (right), containing 30% CH<sub>3</sub>CN) at room temperature. The red line represents the best fitting with single-exponential function.

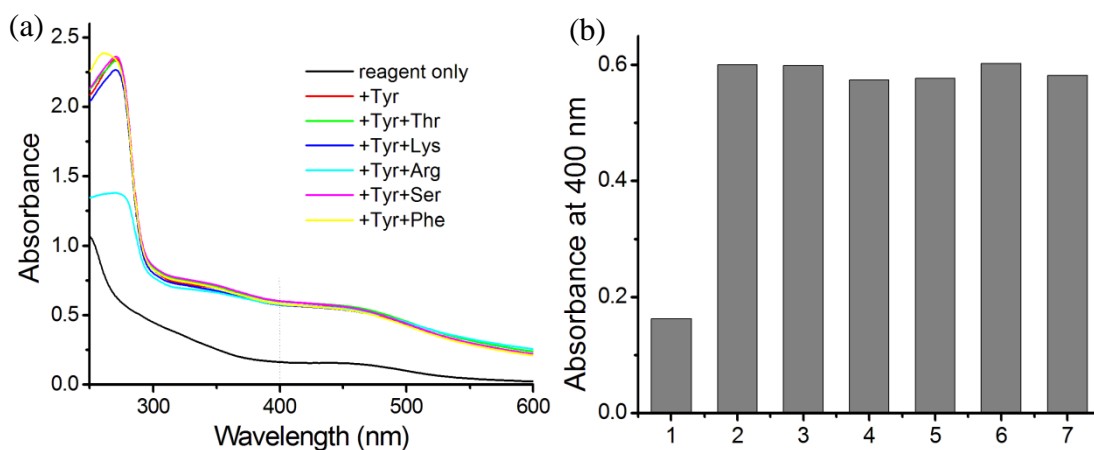

**Fig. S5** Competitive reaction tests of **2** (0.1 mM) and **3** (1 mM) in the presence of some amino acids (1 mM). The reaction was performed at pH 8.0 for 30 min. Absorbance spectra of each reaction solution were checked (a) and the absorbance at 400 nm was shown in (b). Lane 1, only **2**; lane 2, **2** and **3**; lanes 3-7, **2** and **3** in the presence of Thr, Lys, Arg, Ser, Phe, respectively. Because the specific reaction of **2** and **3** gives azo with unique absorbance at 400 nm, the results of similar absorbance value at 400 nm for lanes 2-7 imply that the reaction of **2** and **3** was nearly not disrupted in the presence of amino acids Thr, Lys, Arg, Ser and Phe.

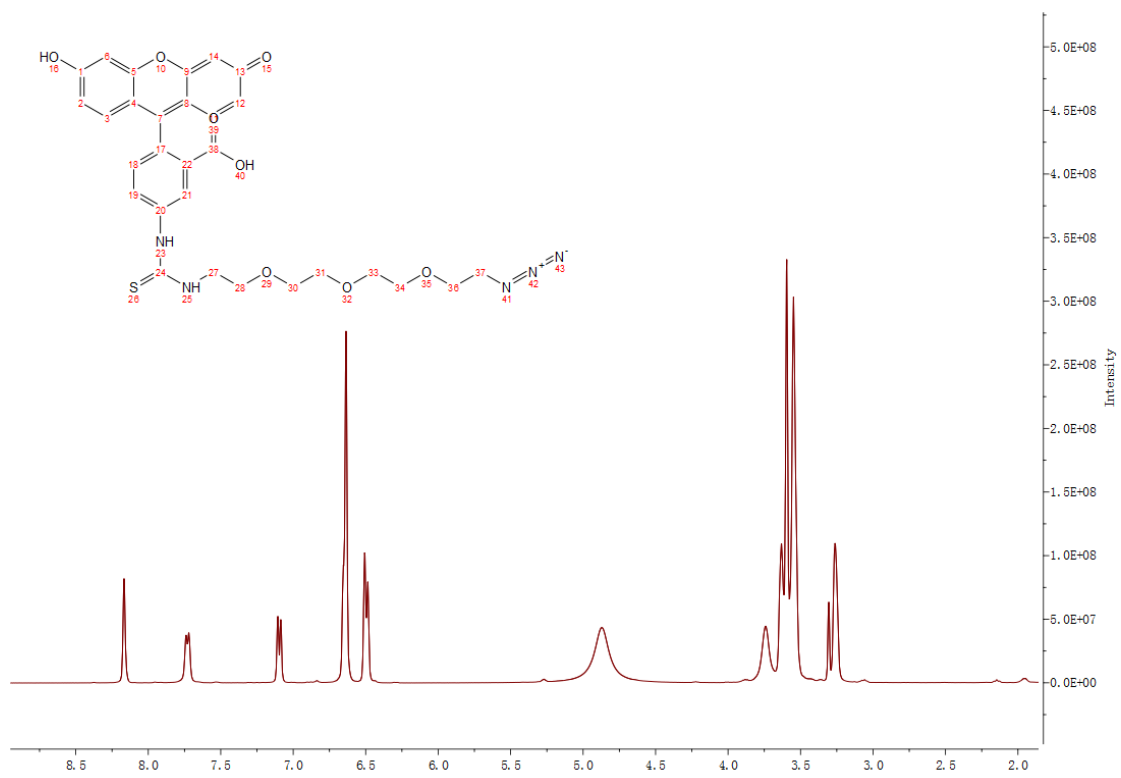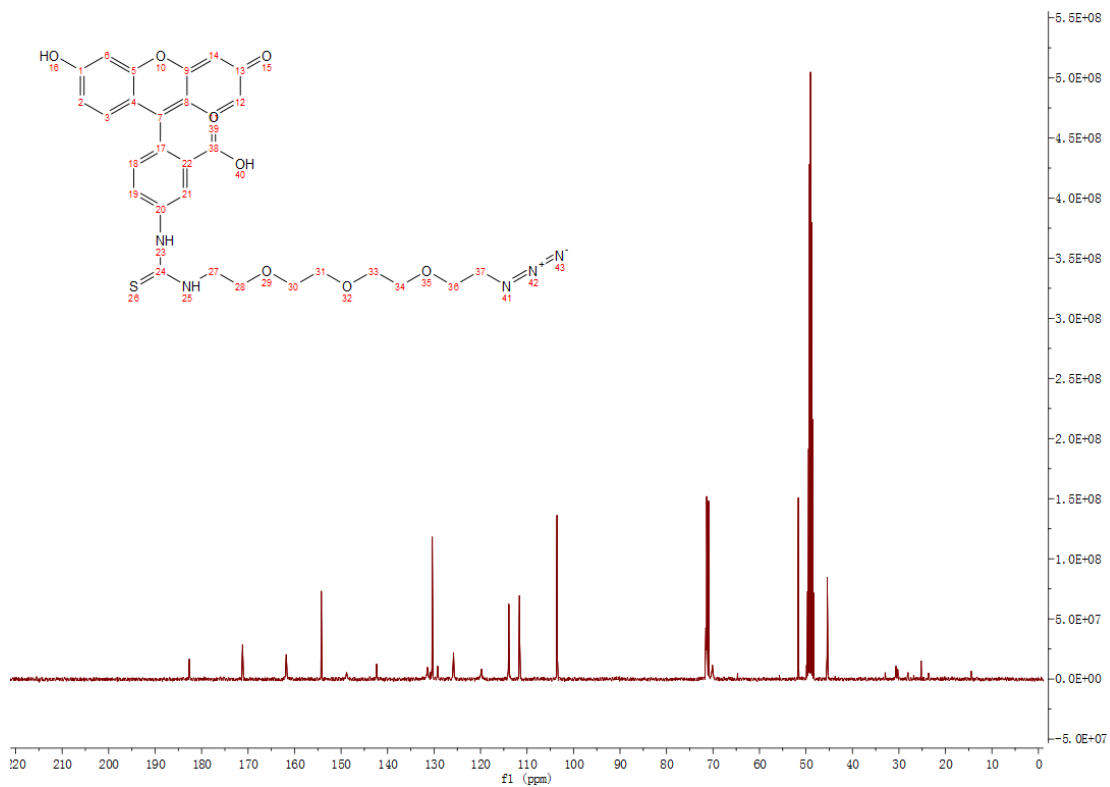

**Fig. S6**  $^1\text{H}$  NMR and  $^{13}\text{C}$  NMR spectra of **6**.

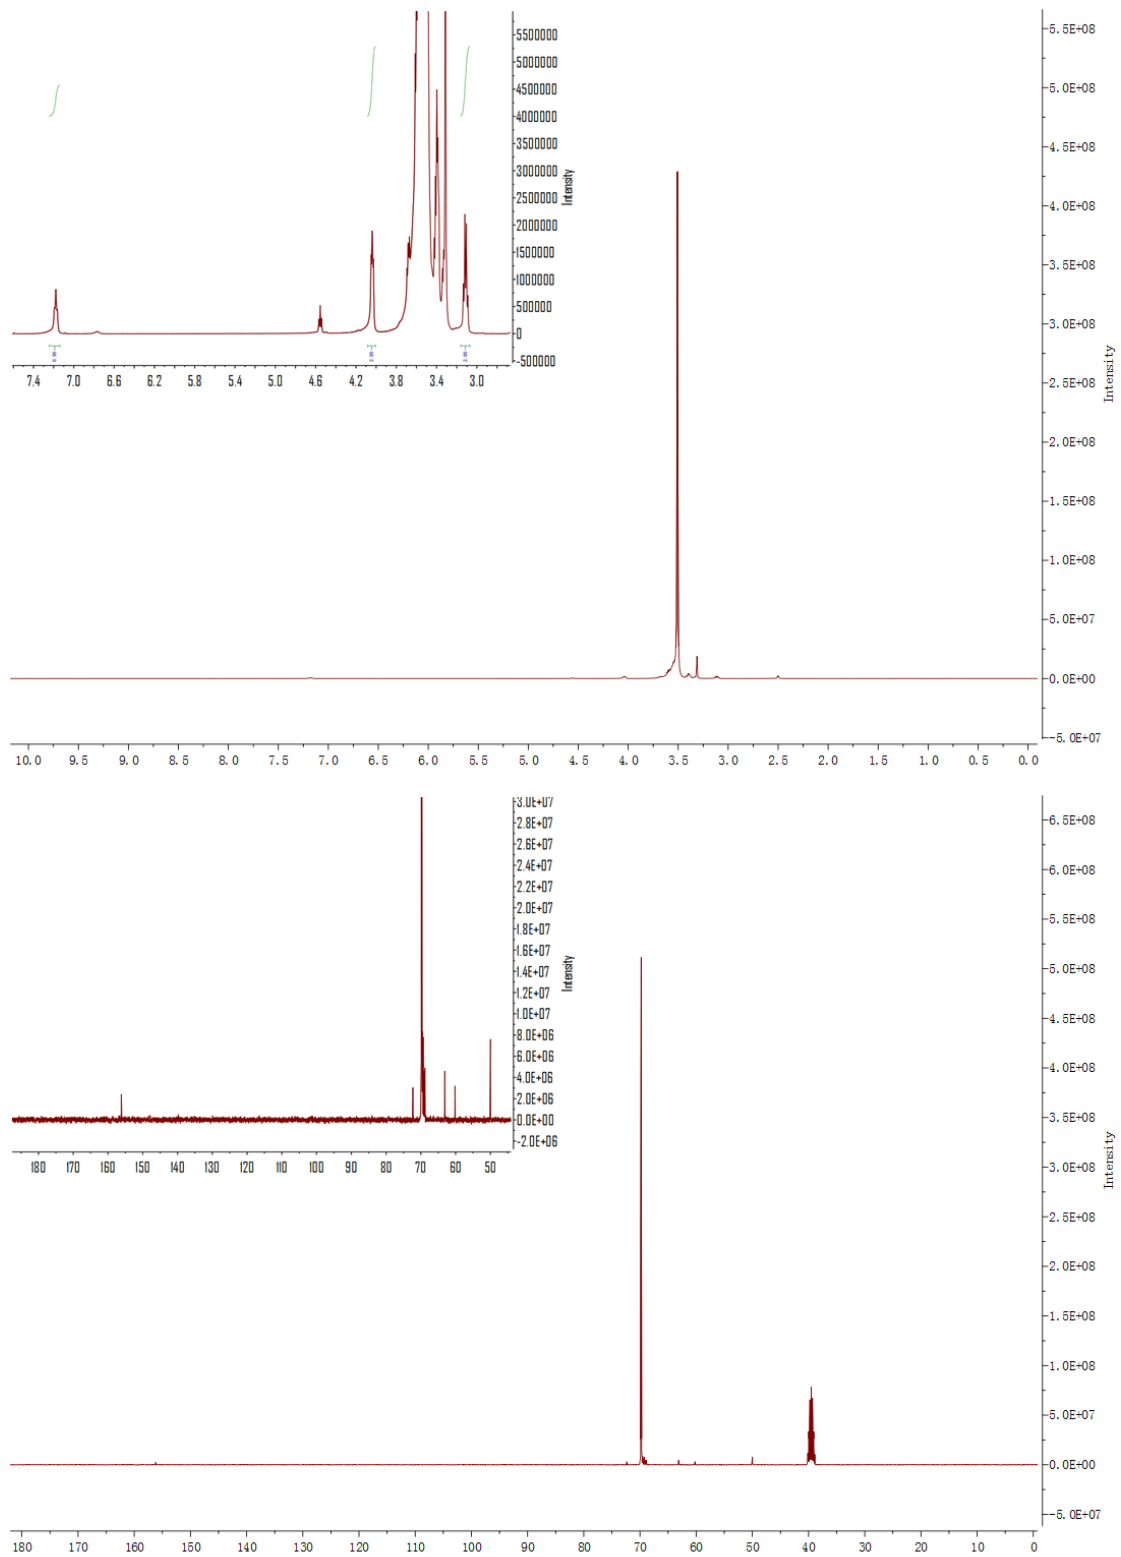

Fig. S7  $^1\text{H}$  NMR and  $^{13}\text{C}$  NMR spectra of azido-PEG 9a.

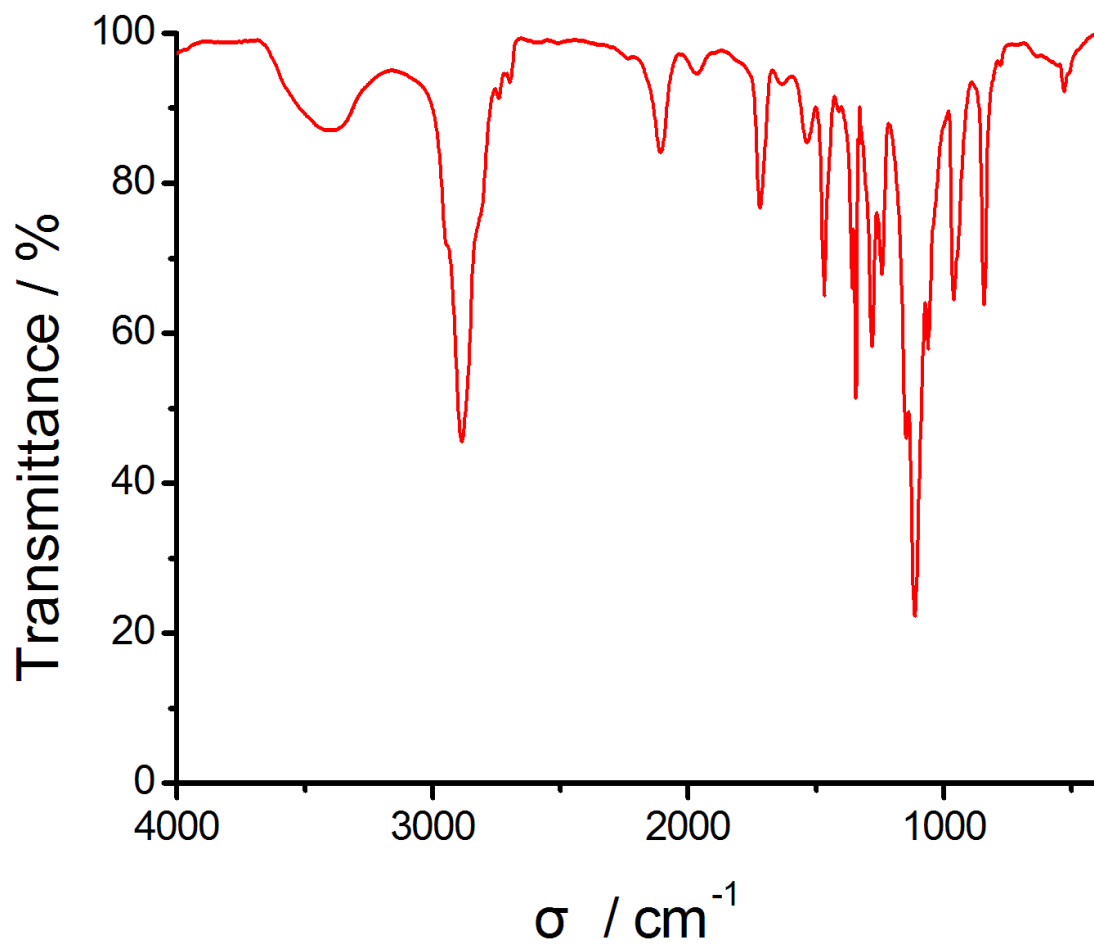

**Fig. S8** Infrared Spectrum of azido-PEG **9a**.

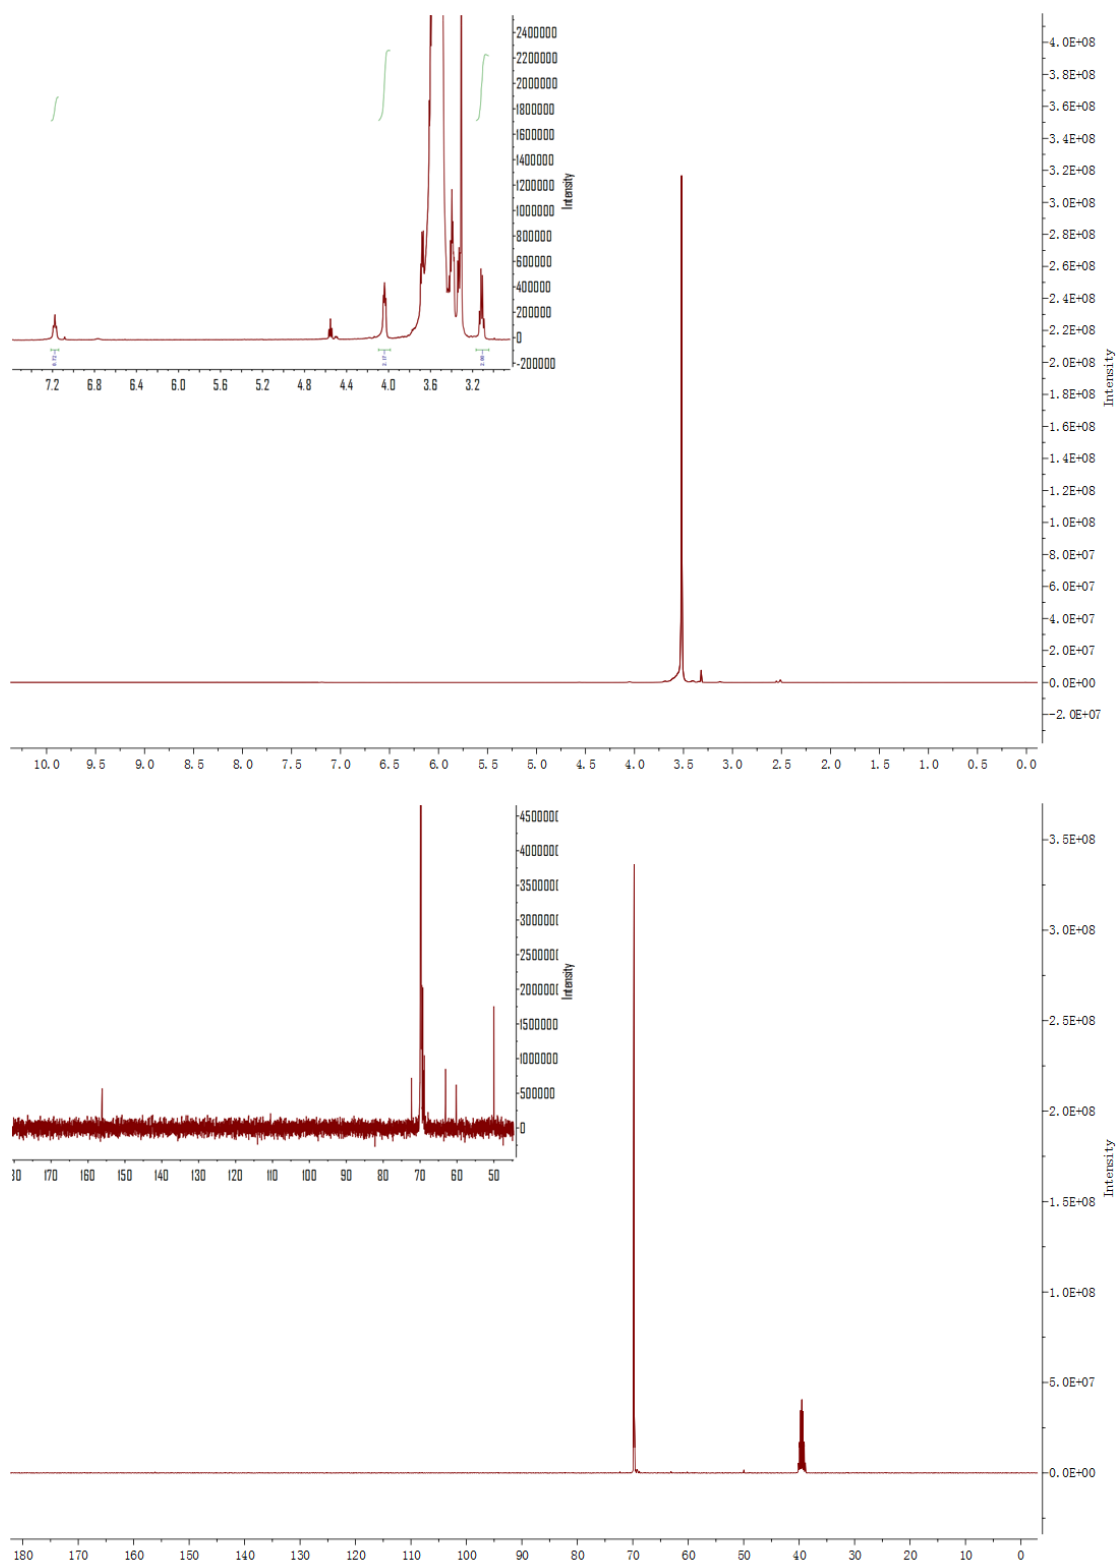

**Fig. S9**  $^1\text{H}$  NMR and  $^{13}\text{C}$  NMR spectra of azido-PEG **9b**.
